# Supplementary material for: Bivalent mRNA booster encoding virus-like particles elicits potent polyclass receptor-binding domain antibodies in pre-vaccinated mice
Source: eLife. 2026 Apr 30;14:RP108959. doi: 10.7554/eLife.108959 (PMC13132547; doi:10.7554/eLife.108959)
Supplement: Supplementary file 1. — Day 56, 154, and 244 geometric mean neutralization titers for cohorts 1–4 against the Wu1, BA.5, BQ.1.1, and XBB.1 variants. [file elife-108959-supp1.xlsx]

## Sheet: Sheet1
	Day 56				Day 154				Day 244
	Wu1	BA.5	BQ.1.1	XBB.1	Wu1	BA.5	BQ.1.1	XBB.1	Wu1	BA.5	BQ.1.1	XBB.1
Cohort 1	56855	274.292	57.9621	50	17842.6	136	50	50	74875.1	850.954	69	75
Cohort 2	65752	253.459	69.4543	82	14021.7	172	52	50	92492.3	4100.4	125	125
Cohort 3	60300.2	513.342	73.6219	57	14129.5	159	50	50	80978.2	4441.3	169	108
Cohort 4	74780	365.252	79.3796	55	16193.7	156	50	50	95514.8	10446	236	162
