# Supplementary material for: Bivalent mRNA booster encoding virus-like particles elicits potent polyclass receptor-binding domain antibodies in pre-vaccinated mice
Source: eLife. 2026 Apr 30;14:RP108959. doi: 10.7554/eLife.108959 (PMC13132547; doi:10.7554/eLife.108959)
Supplement: Supplementary file 2. — The deep mutational scanning (DMS) profiles for antisera from individual mice against the Wu1 and XBB.1.5 RBD libraries shown in Figure 4—figure supplements 1–2 were classified as polyclass (total escape peaks<1 at all sites; green), moderate escape (total escape peaks between 1 and 2 at one or more sites; yellow), or strong escape (total escape peaks >2 at one or more sites; red) profiles. Total escape peaks represent the sum of escape fractions for all mutations at a specific site (Greaney et al., 2021b). For moderate and strong escape profiles, the RBD epitope classes with the highest total escape peaks are specified. [file elife-108959-supp2.xlsx]

## Sheet: Sheet2
Boosting Immunogen	Animal	Wu1 DMS Profile	XBB.1.5 DMS Profile
Wu1 S mRNA-LNP	1_4	Moderate class 5 and 2	Strong class 5
Wu1 S mRNA-LNP	1_9		Strong class 5
Wu1 S mRNA-LNP	1_10	Moderate class 2	Strong class 5
Wu1 S mRNA-LNP	1_1	Moderate class 2	Strong class 5
Wu1 S mRNA-LNP	1_6	Polyclass	Strong class 5
Wu1 S mRNA-LNP	1_7	Polyclass	Moderate class 5
Wu1 S-EABR mRNA-LNP	2_3		Strong class 5
Wu1 S-EABR mRNA-LNP	2_5	Moderate class 2	Strong class 5
Wu1 S-EABR mRNA-LNP	2_9	Moderate class 2	Strong class 5
Wu1 S-EABR mRNA-LNP	2_2	Moderate class 2	Moderate class 5 and 4
Wu1 S-EABR mRNA-LNP	2_4	Polyclass	Polyclass
Wu1 S-EABR mRNA-LNP	2_7	Moderate class 2	Strong class 5
Wu1/BA.5 S mRNA-LNP	3_1	Moderate class 2	Strong class 5
Wu1/BA.5 S mRNA-LNP	3_2	Moderate class 1	Strong class 5
Wu1/BA.5 S mRNA-LNP	3_4	Strong class 2	Strong class 5
Wu1/BA.5 S mRNA-LNP	3_5	Polyclass	Strong class 5
Wu1/BA.5 S mRNA-LNP	3_6	Weak class 3	Strong class 5
Wu1/BA.5 S mRNA-LNP	3_9		Polyclass
Wu1/BA.5 S-EABR mRNA-LNP	4_6		Moderate class 5
Wu1/BA.5 S-EABR mRNA-LNP	4_7	Polyclass	Weak class 4
Wu1/BA.5 S-EABR mRNA-LNP	4_9	Polyclass	Moderate class 4
Wu1/BA.5 S-EABR mRNA-LNP	4_2	Polyclass	Weak class 5
Wu1/BA.5 S-EABR mRNA-LNP	4_3	Weak class 2	Polyclass
Wu1/BA.5 S-EABR mRNA-LNP	4_10	Polyclass	Strong class 5
		Escape fraction
	Polyclass	<0.5
	Weak	0.5-1
	Moderate	1-2
	Strong	>2
